# Supplementary material for: Human-Specific Regulation of Neurotrophic Factors MANF and CDNF by microRNAs
Source: MDPI journal article supplement (doi:10.3390/ijms22189691), 2021-09-07
Supplement: s1 [file s1]

## Supplementary Materials

**Table S1.** List of miRNAs used in current study with their sequences, used prediction tools and conservation status.

| Target gene | microRNA        | Sequence                | Tools   | Conservation (based on TargetScan) |
|-------------|-----------------|-------------------------|---------|------------------------------------|
| hMANF       | hsa-miR-141-5p  | CAUCUUCCAGUACAGUGUUGGA  | D       | N/A                                |
|             | hsa-miR-144-3p  | UACAGUAUAGAUGAUGUACU    | M       | N/A                                |
|             | hsa-miR-544a    | AUUCUGCAUUUUUAGCAAGUUC  | M       | N/A                                |
|             | hsa-miR-338-3p  | UCCAGCAUCAGUGAUUUUGUUG  | M, T    | Conserved                          |
| hCDNF       | hsa-miR-134-5p  | UGUGACUGGUUGACCAGAGGGG  | M, T, D | Poorly conserved                   |
|             | hsa-miR-141-5p  | CAUCUUCCAGUACAGUGUUGGA  | D, T    | Poorly conserved                   |
|             | hsa-miR-190a-5p | UGAUAUGUUUGAUUAUUAUAGGU | M, T    | Poorly conserved                   |
|             | hsa-miR-382-5p  | GAAGUUGUUCGUGGUGGAUUCG  | M, T, D | Poorly conserved                   |
|             | hsa-miR-539     | GGAGAAAUUAUCCUUGGUGUGU  | M, T, D | Poorly conserved                   |
|             | hsa-miR-599     | GUUGUGUCAGUUUAUCAAAC    | M, T, D | Poorly conserved                   |

M – miRanda; T – TargetScan; D – Diana Tools microT-CDS

**Table S2.** List of miRNA mimics used in this study

| <b>miRNA mimic</b> | <b>miRIDIAN catalog number</b> |
|--------------------|--------------------------------|
| hsa-miR-134-5p     | C-300628-05-0002               |
| hsa-miR-141-5p     | C-301056-01-0002               |
| hsa-miR-144-3p     | C-300612-05-0002               |
| hsa-miR-190a-5p    | C-300639-03-0002               |
| hsa-miR-338-3p     | C-300706-05-0002               |
| hsa-miR-382-5p     | C-300691-03-0002               |
| hsa-miR-539-5p     | C-300859-01-0002               |
| hsa-miR-544        | C-300860-03-0002               |
| hsa-miR-599        | C-300923-01-0002               |
| NC (Scrb) mimic    | CN-001000-01-05                |

**Table S3.** List of PCR primers used for amplification of 3'UTRs of MANF and CDNF (both human and mouse).

| PCR primers            | Primer sequences (F: forward; R: reverse)                                                                               |
|------------------------|-------------------------------------------------------------------------------------------------------------------------|
| Human MANF<br>3'UTR    | F: 5' TCGCTCGAGTCTGCTCAATCTCTGTTGCAC<br>R: 5' AGAGCGGCCCGCAGGAGCCTCCTGGGGCA                                             |
| Human CDNF<br>3'UTR    | F: 5' TCGCTCGAGTCTCCAATGCCAGCACATTTGT<br>R: 5' AGAGCGGCCCGCCCAAGTTGCCTATGAGTGTTTTTA                                     |
| Mouse MANF<br>fragment | F: 5' TGCCTAAATACGCCCCCAAG<br>R: 5' GTTTCGCTCGCTGCCTATCA                                                                |
| Mouse MANF<br>3'UTR    | F: 5' TAGGCGATCGCTCGAGTCTGCCCAATTCCTGCTGCACCTG<br>R: 5' TTGCGGCCAGCGGCCGCTCGGGGCCACGCCC                                 |
| Mouse CDNF<br>3'UTR    | F: 5' TAGGCGATCGCTCGAGCCCCGTCGGCTGTCAG<br>R: 5' TTGCGGCCAGCGGCCGCAATGTATATTTATTATCTGAATTTAAGTTATTC<br>TCTTGCGGCCAGCGGCC |

**Table S4.** List of PCR primers used for site-directed mutagenesis.

| miRNA, which binding site to be mutated |          | Primer sequences (F: forward; R: reverse)                                     |
|-----------------------------------------|----------|-------------------------------------------------------------------------------|
| hCDNF                                   | miR-134  | F: 5'-TTCATTCCCTTACAacCACATATCAGACAAG<br>R: 5'-AAAGACCTTGAGCTTGGTTCAATTAACAAT |
|                                         | miR-141  | F: 5'-AAGTTTTTGATGGggGATTAAAGCATAT<br>R: 5'-GTCTGATATGTGACTGTAAGGAATGAAAAA    |
|                                         | miR-190a | F: 5'-CCTTACAGTCACAcgTCAGACAAGTT<br>R: 5'-AATGAAAAAGACCTTGAGCTTGGTTC          |
|                                         | miR-382  | F: 5'-TATCTAATGCACggCTTCAATCCCAAATAC<br>R: 5'-AGCTGACTGTTGTGTCTTTTGTTTTAGTCC  |
| hMANF                                   | miR-144  | F: 5'-TCCTGACAATAagGTATCAGATGTGA<br>R: 5'-GCCCACTTAAAAAATAAATTACAAAAAGG       |
|                                         | miR-544  | F: 5'-TAGCTGTCCTTGcAATTATAGTGAA<br>R: 5'-GAAATTTTTTTTCTTTAATAAAAAAATCCC       |

**Table S5.** List of PCR primers used for RT-qPCR analysis of ER stress markers expression.

| PCR primers | Primer sequences (F: forward; R: reverse)                      |
|-------------|----------------------------------------------------------------|
| Human BiP   | F 5' ACCCTGACTCGGGCCAAAT<br>R: 5' AGACCGGAACAGATCCATGTTG       |
| Human ATF6  | F: 5' GGATGAAGTTGTGTCAGAGAACC<br>R: 5' GACAACTCTTCGCTTTGGACTAG |
| Human CHOP  | F: 5' CCAGCAGAGGTCACAAGCA<br>R: 5' TGACTGGAATCTGGAGAGTGAG      |
| Human XBP1s | F: 5' GAGTCCGCAGCAGGTG<br>R: 5' CCGCCAGAATCCATGGG              |
| Human GAPDH | F: 5' TTGAGGTCAATGAAGGGGTC<br>R: 5' GAAGGTGAAGGTCGGAGTCA       |

**A**

**B**

**mMANF 3'UTR**

UCUGCCCAAUCCUGUCACCUGAAGGGGAAAAAGCAGUUUAUCUGUCUCUUCGCCAAUAACCAUUUUGUAUUUUUUUUU

GUUGUUUUAGUGACUACGACCU

UAAAGCGGGCUCUGACAAUGAGAUGUGAACCUAGAGCUUUCUAGUGAUGGUCUCUGCAGUUCGCCUUGGCCAUCCCCG  
 AGUGGGGACAAUUCGCCAUCCCCAAGUGGGGACAAUUUACUUCUUCUUGGUGUUUACUCUAGGACUUCAAAGUUUUGUC  
 UGGGAUUUUUUUUAUAAAAAAUUGUCUUUGGAGAGUUGAGCUGGCACAGUAUUCUGUCCUUAUAGAUUACUGGUUUUAUCUU  
 UCCAGUCUGGAAAGAACUCCUACGCCUGGCAGUCUGAGGCGUAGAACUCCUAAACAGGACCUUAAAGAGCUUGGGGACGCCAA  
 UGUCUUGUGGGUUUGGGCUUGCGGUGUCUGAUACUUCUACGCCUGGUGAGGUUAGACUUGACCCUAGCCCCACCCCCAAC  
 CAGUCCAGUAGCAGGGGCUGAAGGUUCUUGAGCUGCUGUUAAGUCUAAAGGACAUUUACAUUUGGCUCAGCCUUAUGCAGAAG  
 GAGAACUGUGAGCUGAGUACAGGUGGUUCAGACCAUAGCGUAUCUUUACCCCGCCUGGUACUUAACUUAUUCAUUACUGGGG  
 UUCCAGUCUAGCAUCAGAACAAGGACCCUUGCUUACCUUUAUUUUUGGCAAGGUUGGCAGGAUUCGGUUUACAAGAAGCAGU  
 GUGAGCUGGUUUAGUGAGGGAAGGCCUGAGGGAGGUUGAGUCUAGUGGUUUUACUUGCUCUCCUUUGCGGCACUUGUAGAAC  
 UGUGCCUCAGUGGGGAACUUUGCUCUUGCGUCCUCCAGAGAUAAUGAGAAGGAGCAUCUGCUAAGAAGUUAUGUUUUCCA  
 AAAGGCUCGUUUAGCUAUCUUUCUGUGUGGCCCAAUUCACUUUGCAUUCGACGGGGCCUUAUAGUAGGCCCUUGCUGU  
 UUCUCCAAGUUCUCCUGCAGUUUCUCCUUGCUGUGUUCUUCGUUUAGGGAGGAGGAAGAGCUGGGUGCGUUCU  
 UCGACAUCUACAGAUCAUCAUUAUGAUCCAGCAACCGUCUGUGGAGAGCAUAAAGCCUAGGGGGCCUUGAGUACUCUUGCCG  
 GUACUUAACCUCAUCUCCUGGAUGUGGUCAGAACUUGGCCAGCAGUCUGUCAACUUGGCAAGAAGUGAUAAUGGCAUUACC  
 UGCUUUUUACCUUUGGCUACGACGCCCAACCUUCCGACGCCUUGCUGCCGACACCUACAGCAGAAUUUUGGACCCAGU  
 GGCACCAAGAUGCCUGUCUGUAGGUUUGCAACGCAUUCUAGUUUUGUACCUAGGACCCCGGGGAGGUCUACCUUGUCUA  
 UCAGGACAGUGCCUUGAAGAAUUCGAUUGCAUUAAGAUUGCCUGUUGGUGUUGGCUUAGGCAGGGUGUAGGCAUCUUGUGUGUC  
 UAUUUUACAAGGGGGCCCAACUCUGGUCCUAAUUCAGAAACUUGGAGGAAUUAAGAUUUUCUUAUUGGCGAGGUUG  
 GAGUGGGGACGCGCAACACUUGGCUUUGCGGCCAAGCGGCCACACCUUGUCCGGUGGGGUGGCCCCGAGGCGG
